# Supplementary material for: Effect of traditional Chinese medicine therapy on labor pain in patients with natural childbirth: A network meta-analysis
Source: PubMed Central journal article supplement — Medicine (Baltimore). 2024 Oct 25;103(43):e39425. doi: 10.1097/MD.0000000000039425 (PMC11521081; doi:10.1097/md.0000000000039425), 2024-10-25
Supplement: medi-103-e39425-s001.pdf [file medi-103-e39425-s001.pdf]

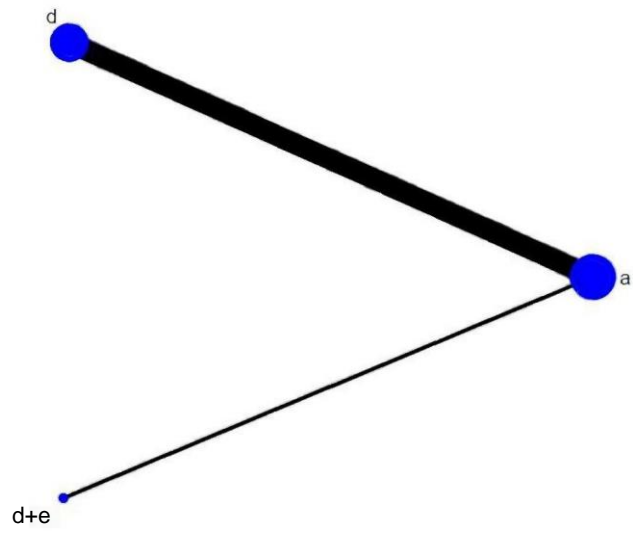

Supplementary Figure.1A

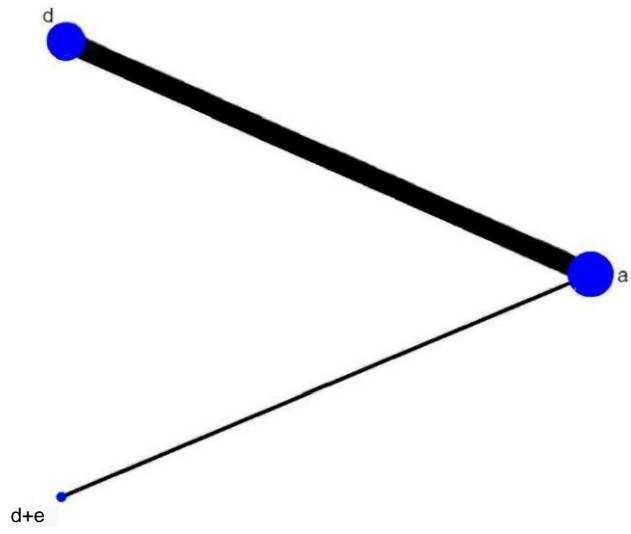

**Supplementary Figure.1B**

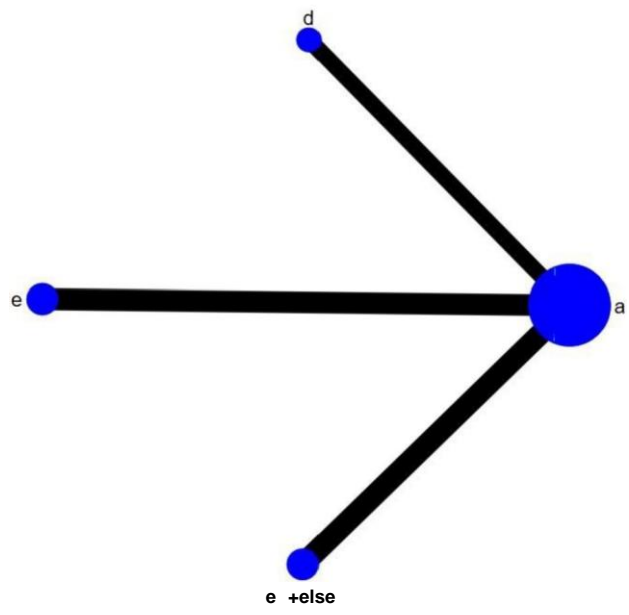

Supplementary Figure.1C

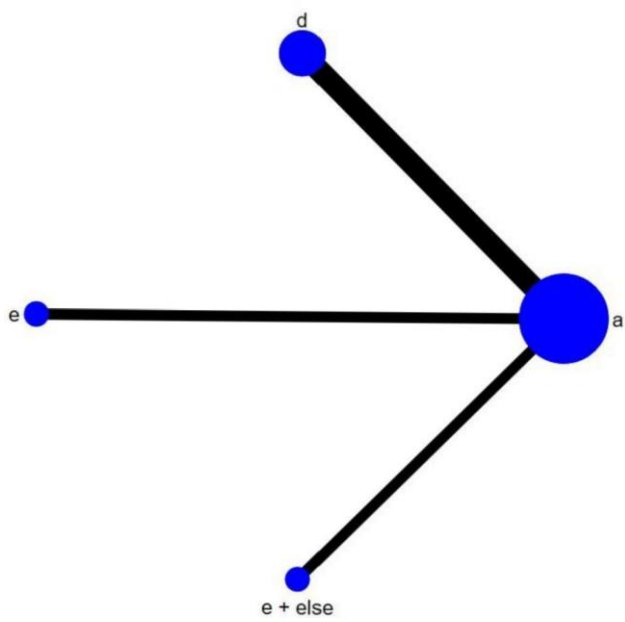

Supplementary Figure.1D

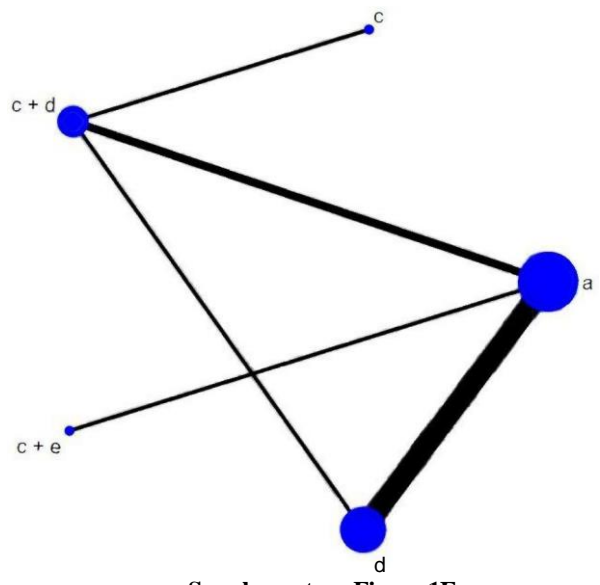

Supplementary Figure.1E

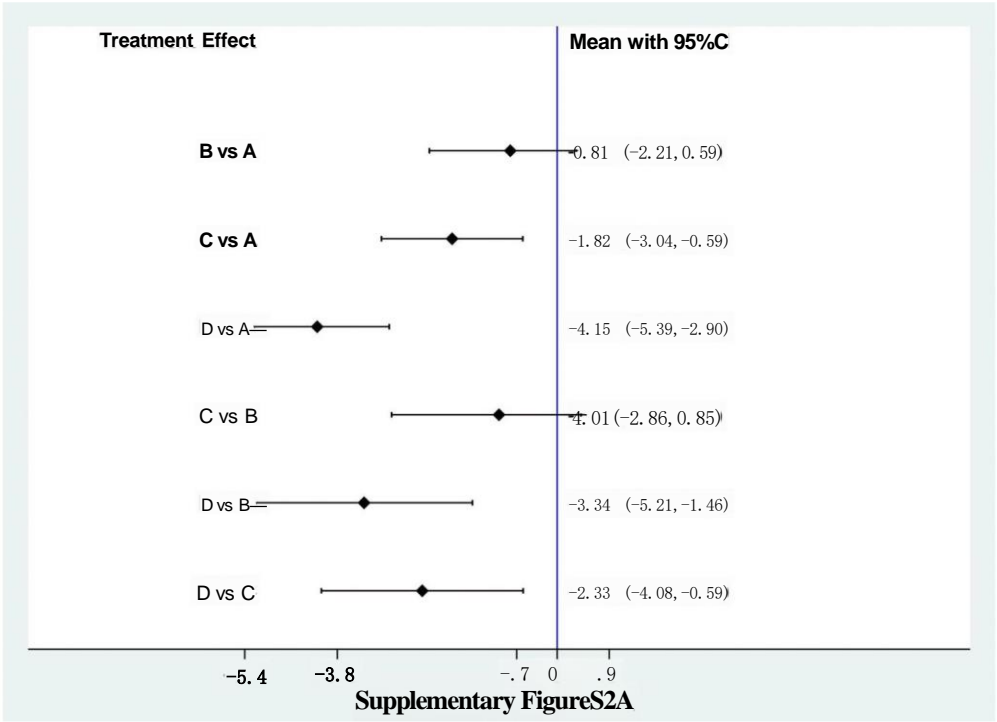

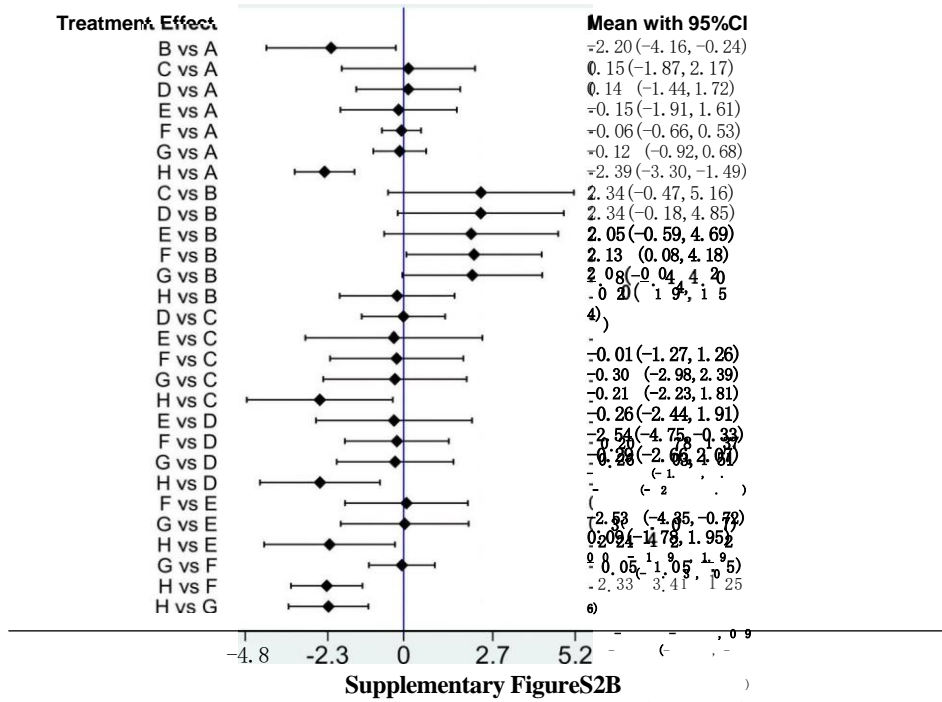

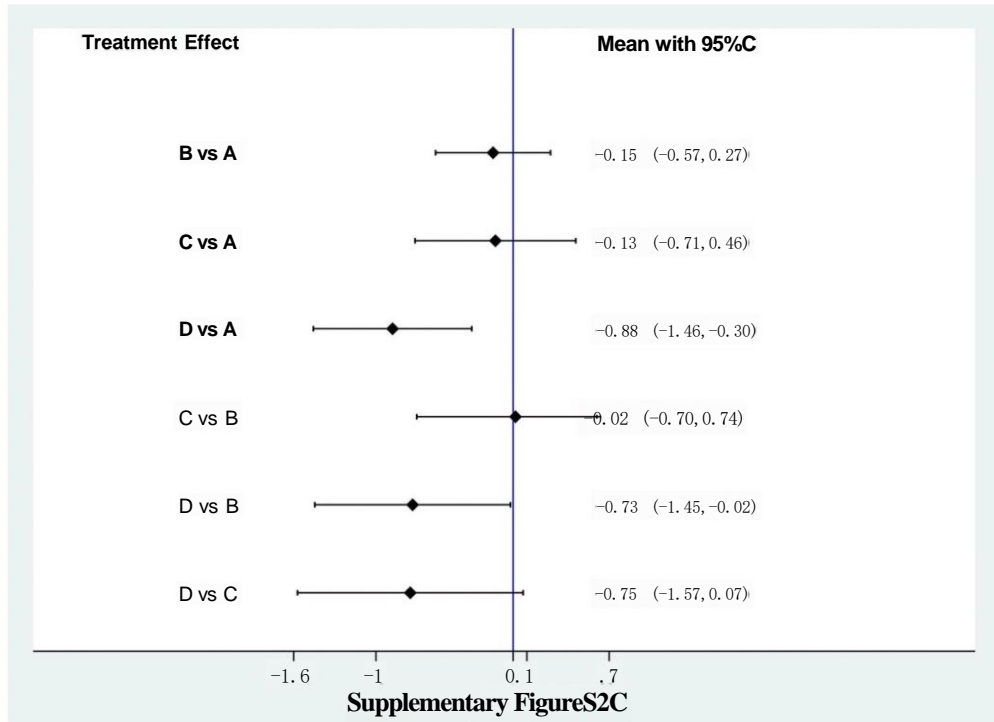



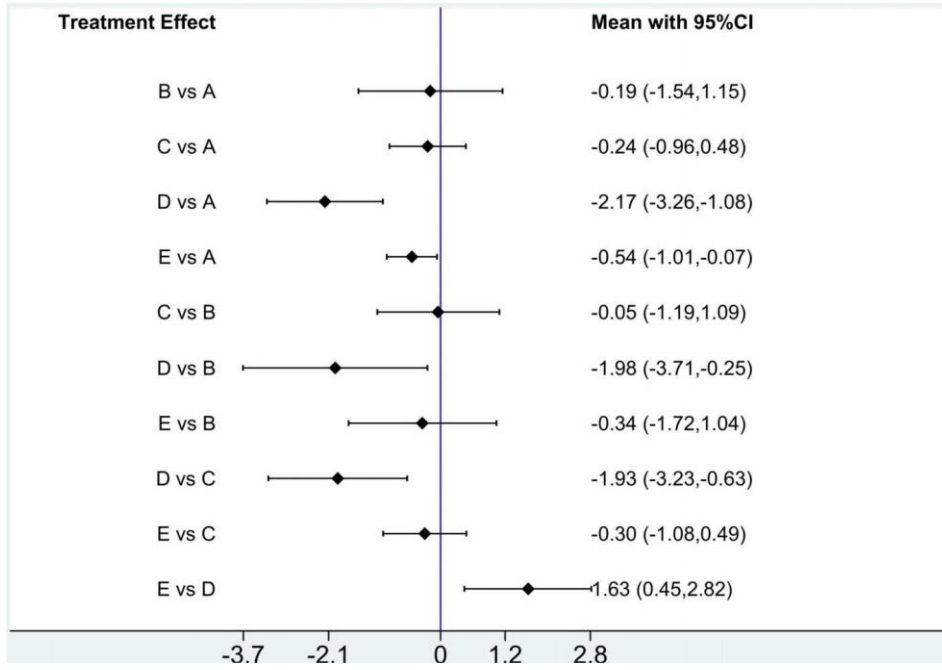

Supplementary FigureS2D

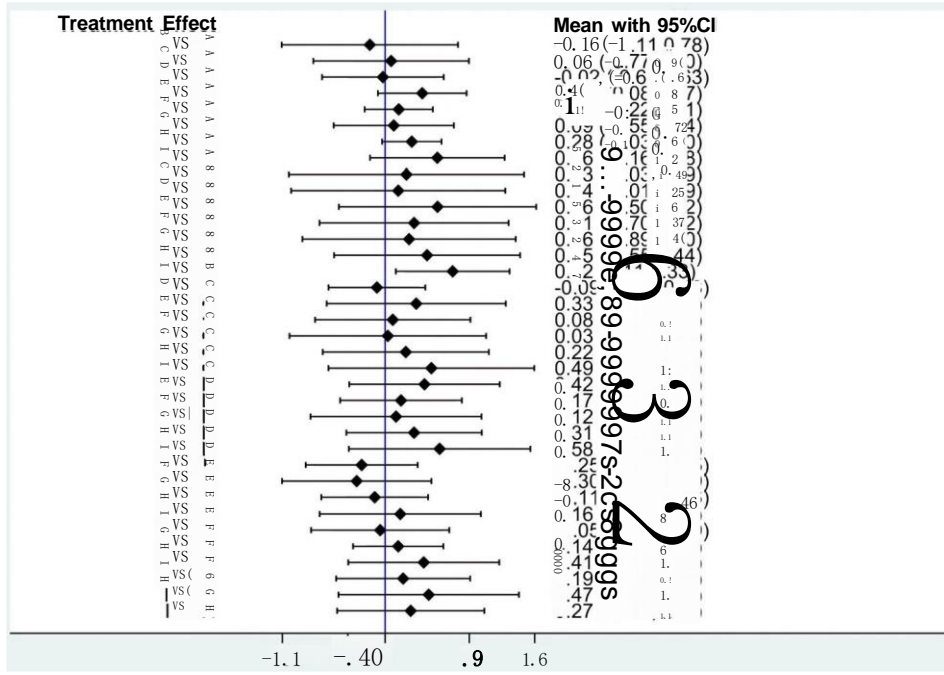

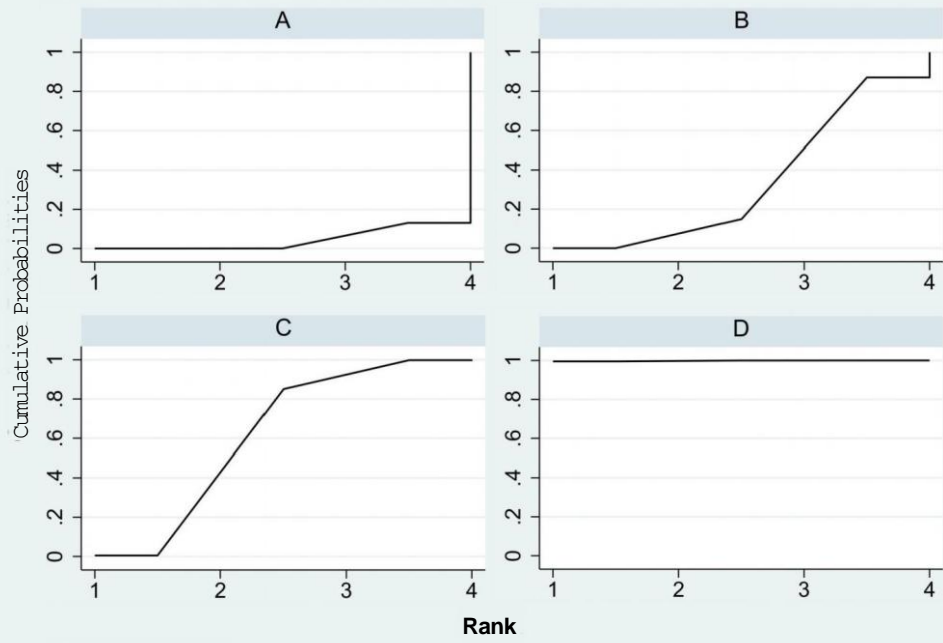

Graphs by Treatment

Supplementary FigureS3A

### Cumulative Probabilities

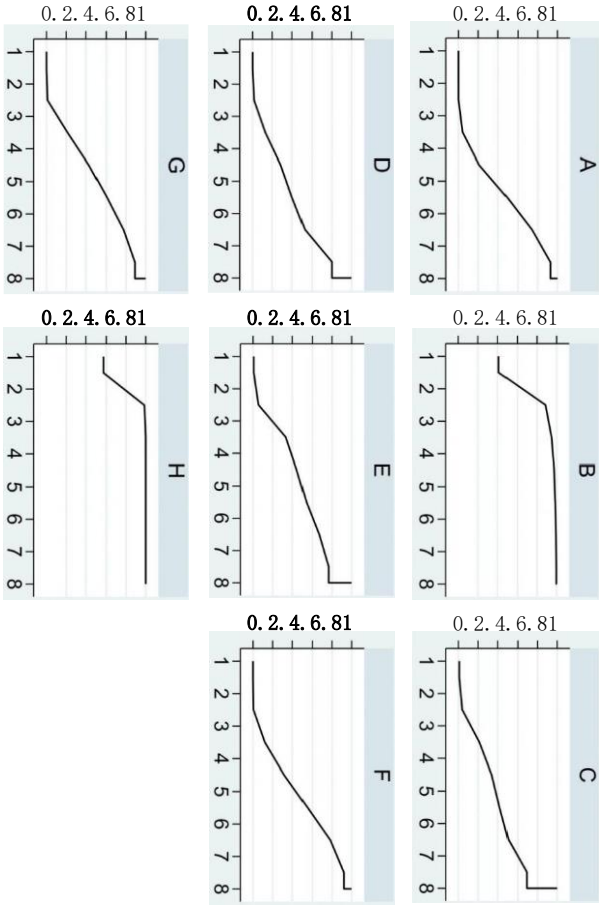

Graphs by Treatment

Supplementary Figure 3B

Rank

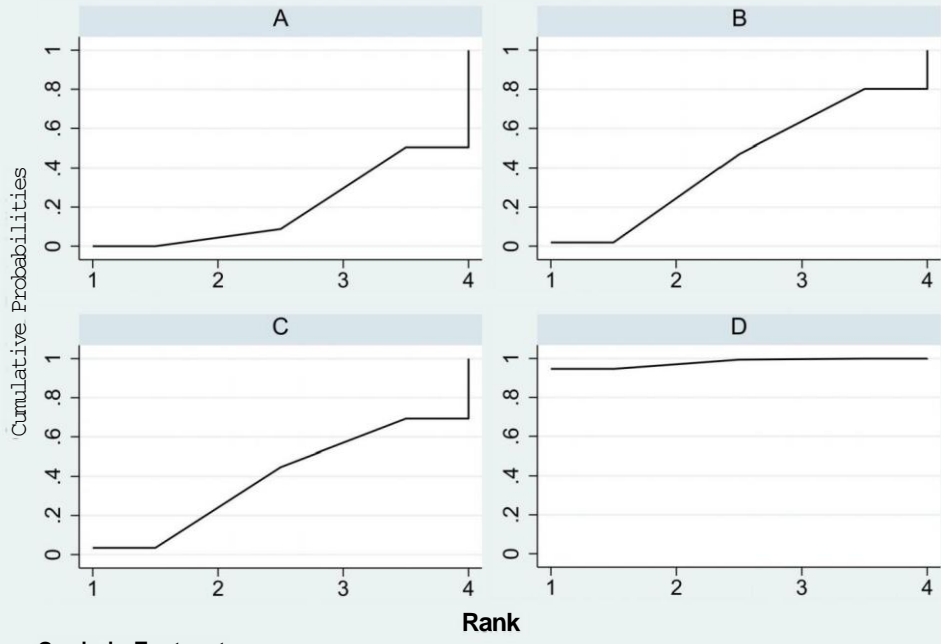

Graphs by Treatment

Supplementary FigureS3C

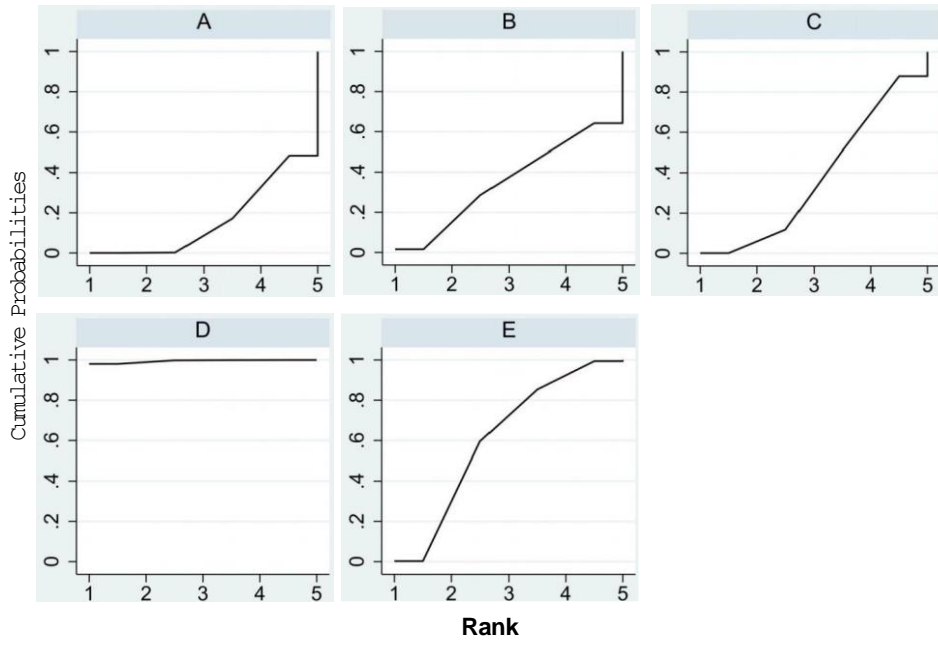

Graphs by Treatment

Supplementary FigureS3D



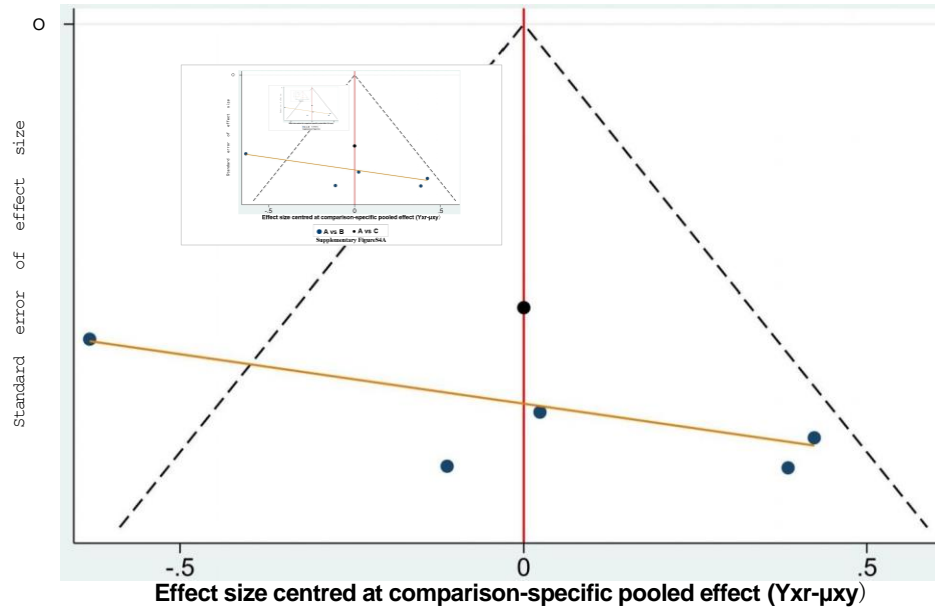

● A vs B ● A vs C  
 Supplementary FigureS4A



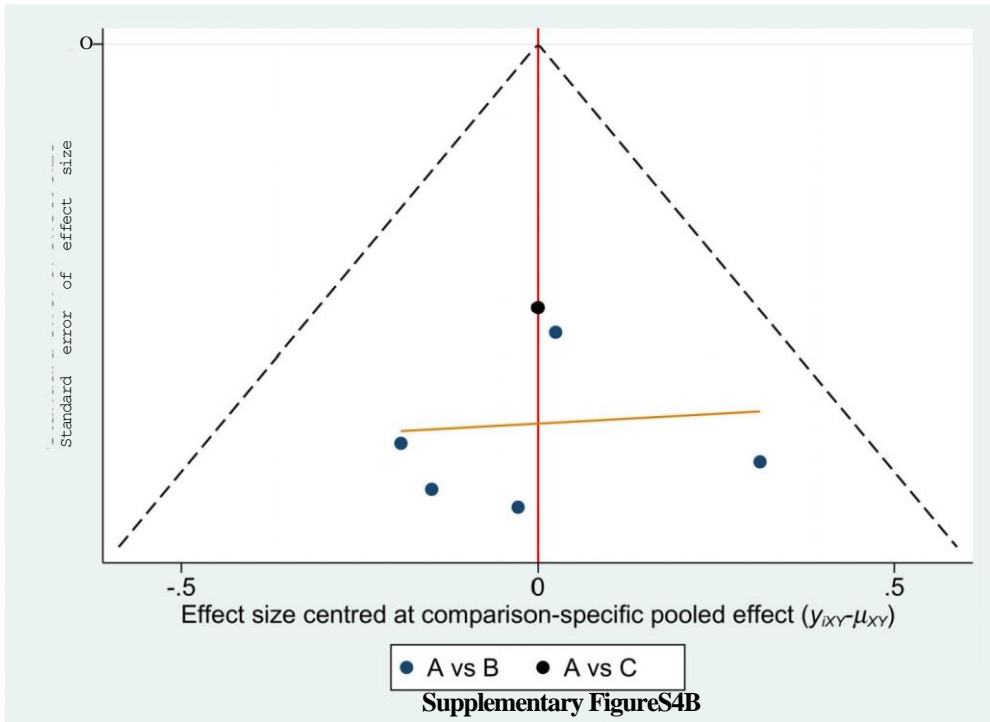

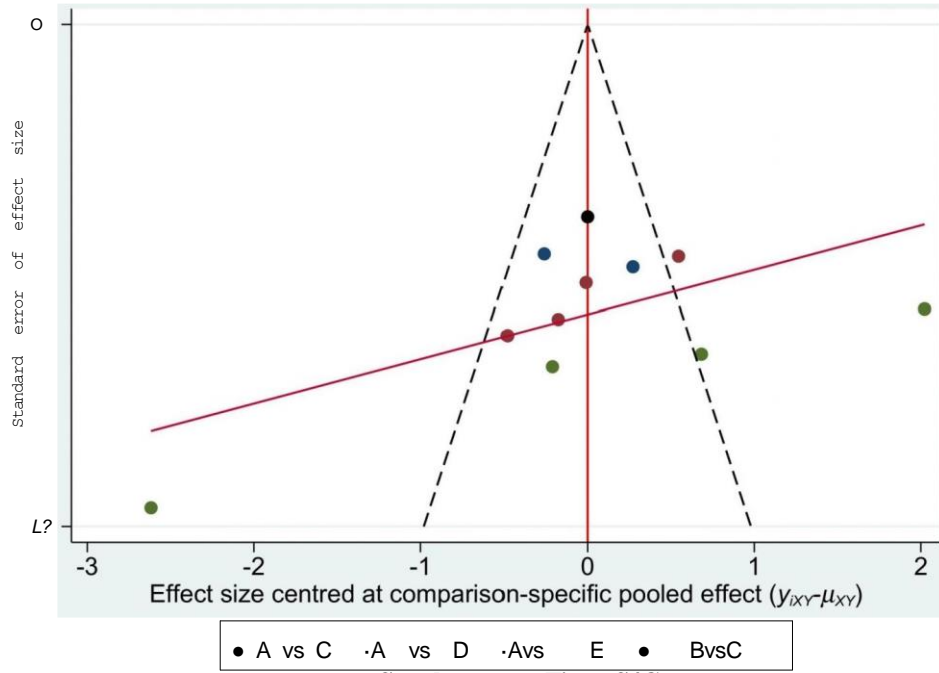

Supplementary Figure S4C

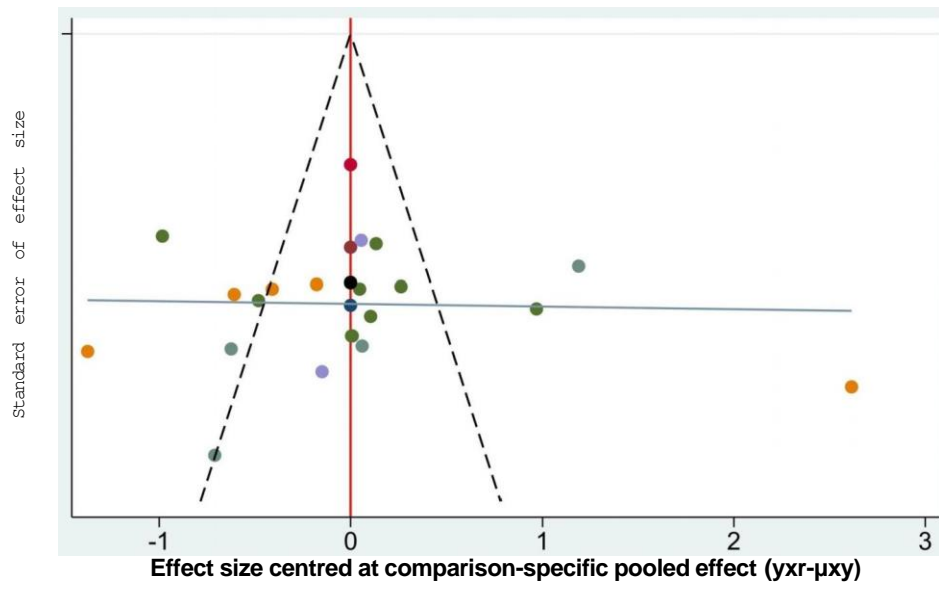

L?-

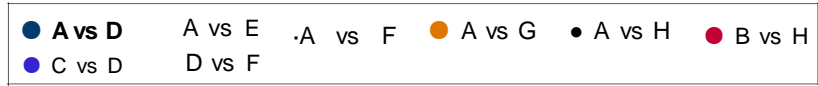

Supplementary Figure.4D

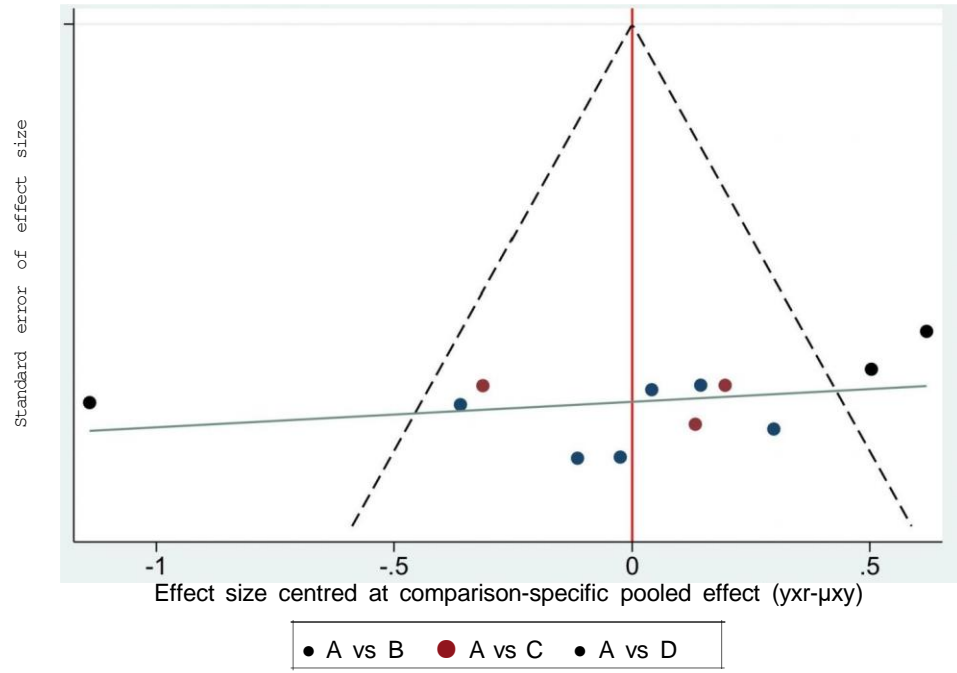

Supplementary Figure.4E

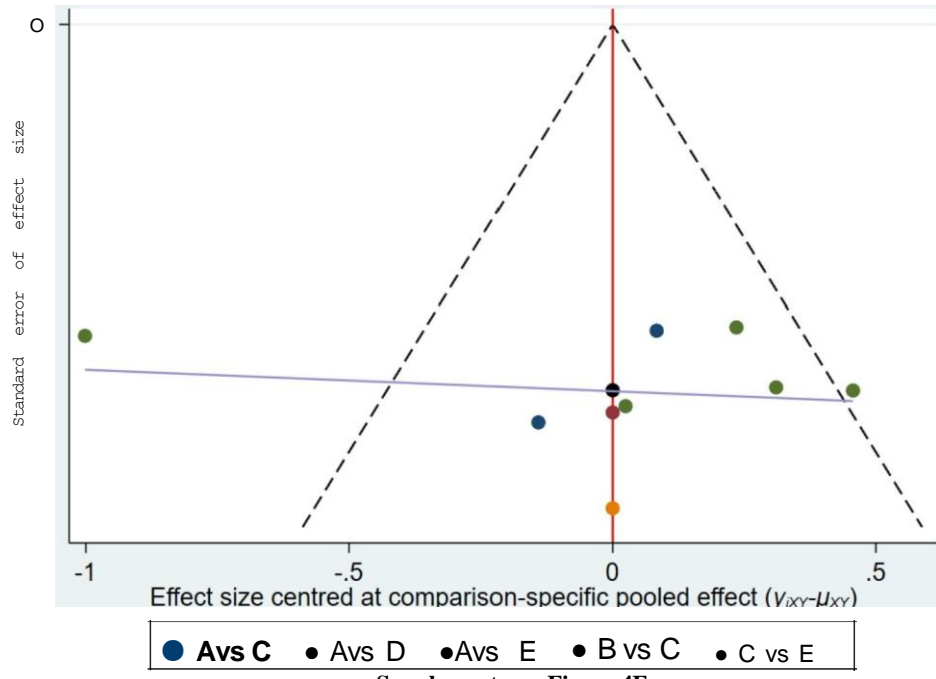

Supplementary Figure.4F

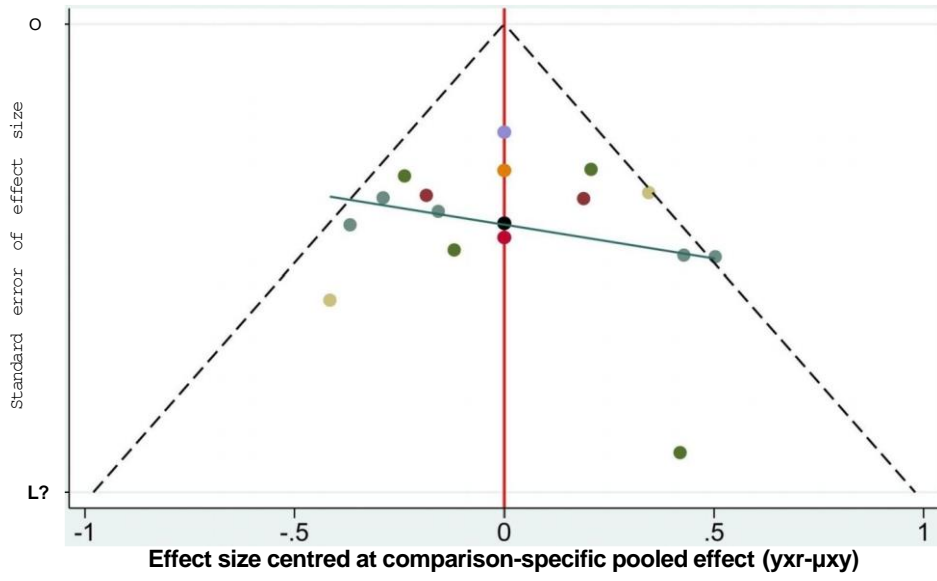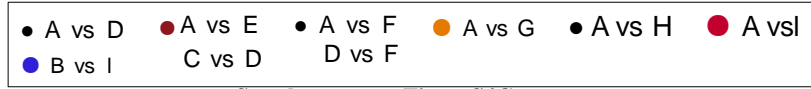

Supplementary FigureS4G
